1 Original Article

2 Decomposing intraspecific phenotypic variation: implications for species and functional  
3 diversity

4 Samantha J. Worthy<sup>1\*</sup>, María N. Umaña<sup>2</sup>, Caicai Zhang<sup>3</sup>, Luxiang Lin<sup>4,5</sup>, Min Cao<sup>4</sup>, Nathan G.  
5 Swenson<sup>6</sup>

6 <sup>1</sup>Department of Evolution and Ecology, University of California, Davis, Davis, California,  
7 95616, USA

8 <sup>2</sup>Department of Ecology and Evolutionary Biology, University of Michigan, Ann Arbor,  
9 Michigan, 48109, USA

10 <sup>3</sup>Institute of Eastern-Himalaya Biodiversity Research, Dali University, Dali, Yunnan, 671003,  
11 China

12 <sup>4</sup>CAS Key Laboratory of Tropical Forest Ecology, Xishuangbanna Tropical Botanical Garden,  
13 Chinese Academy of Sciences, Kunming, Yunnan, 650201, China

14 <sup>5</sup>National Forest Ecosystem Research Station at Xishuangbanna, Mengla, Yunnan, 666303,  
15 China

16 <sup>6</sup>Department of Biological Sciences, University of Notre Dame, South Bend, Indiana 46556,  
17 USA

18 \*For correspondence. Email: [sjworthy@ucdavis.edu](mailto:sjworthy@ucdavis.edu)

19  
20 Running Title: Decomposing intraspecific variation

21

## 1 **Abstract**

2 *Background and Aims.* Researchers have a long history of seeking an explanation for and  
3 understanding of diversity patterns. High-dimensional trait-based trade-offs have been  
4 hypothesized as being important for maintaining species and functional diversity. These  
5 relationships have primarily been investigated at the community-level rather than within species,  
6 despite the importance of intraspecific variation to species and functional diversity maintenance.  
7 The goal of this research is to determine if trait combinations are present within species and the  
8 impacts of this on species and functional diversity in a tropical forest seedling community in  
9 China. We ask 1) do the trait combinations found across species, at the community-level, also  
10 exist within species?; 2) how consistent or inconsistent are trait combinations across species?;  
11 and 3) how do findings align with species co-occurrence patterns?

12 *Methods.* We model species-specific growth with individual-level trait measurements,  
13 environmental data, and their interactions, allowing for the identification of intraspecific trait  
14 combinations and quantification of the contribution of each model variable to growth.

15 *Key Results.* We find that two of three species have intraspecific trait combinations. Specifically,  
16 we find that individuals within these species share a trait combination, but how they combine the  
17 traits differs depending on the type and level of soil nutrients. Furthermore, we find that  
18 similarity among species in trait combinations and variables that contribute most positively to  
19 growth may lead to negative spatial co-occurrence patterns of species.

20 *Conclusions.* Overall, we find that species have multiple traits or interactions between traits and  
21 the environment driving their species-specific strategies for growth success. These results  
22 highlight how individuals within species are highly variable, with phenotypically different

1 individuals having similar growth performance, and suggest how high species and functional  
2 diversity can be maintained in communities.

3

4 Key Words: diversity, functional traits, growth, intraspecific variation, seedlings, trait  
5 combinations, tropical forest

6

7

## 1 **Introduction**

2 Ecologists have long investigated, and struggled to explain, the mechanisms that maintain  
3 species diversity (Hutchinson, 1961; Clark, 2010). Diversity patterns are driven by differential  
4 demographic outcomes, which arise from how phenotypes interact with the environment  
5 (Ackerly, 2003, HilleRisLambers et al., 2012). Relationships between phenotypes, the  
6 environment, and demographic outcomes are complex, but high-dimensional trait-based trade-  
7 offs have been hypothesized as being important for maintaining species and functional diversity  
8 in communities (Clark et al., 2010, Adler et al., 2013, Kraft et al., 2015; D’Andrea and Ostling,  
9 2016). While these relationships have been investigated at the community level, the presence of  
10 these complex relationships within species has gone largely unconsidered in trait-based  
11 community ecology, despite the known importance of intraspecific variation for generating and  
12 maintaining species and functional diversity (Hart et al., 2016; Turcotte and Levin, 2016).

13 One way ecologists have examined the relationships between phenotypes, the  
14 environment, and demographic rates is by investigating the presence of different trait  
15 combinations. (Marks and Lechowicz, 2006; Adler et al., 2014; Laughlin and Messier, 2015;  
16 Dwyer and Laughlin, 2017; Laughlin et al., 2018). Often these studies seek to link variation and  
17 trade-offs in functional traits to variation in the environment or demographic rates (Laughlin and  
18 Messier, 2015; Laughlin et al., 2018; Dias et al., 2019; Li et al. 2021). Previous research has  
19 found evidence of demographic success linked to multiple trait combinations at the community-  
20 level both within and across environmental gradients (Laughlin et al., 2018; Dias et al., 2019;  
21 Worthy et al., 2020; Li et al., 2021).

22 A major theme from previous work is that although there is evidence of multiple trait  
23 combinations leading to demographic success, the number of combinations is relatively small

1 compared to the number of species in the study systems (Dias et al., 2019; Pistón et al., 2019;  
2 Worthy et al., 2020; Li et al., 2021). For example, Worthy et al. (2020) found evidence of only  
3 eight different trait combinations in a community composed of 122 species. To reconcile the low  
4 number of trait combinations found in communities with high levels of species diversity, one  
5 may assume that multiple species must have the same combination of traits leading to  
6 demographic success.

7         Based on the assumption that multiple species have the same trait combination, initial  
8 hypotheses can be made about how high species and functional diversity can be maintained in  
9 communities with so few ways for species to achieve demographic success. One hypothesis  
10 could be that some species have highly variable traits allowing individuals within a species to  
11 have different trait combinations that overlap with those of other species, limiting the total  
12 number of combinations found in a community. The alternative to this hypothesis would be that  
13 each species, in fact, does have a unique trait combination that is consistent among individuals.  
14 This would mean that each species is a specialist, each with their own way of achieving  
15 demographic success (MacArthur and Levins, 1967; Tilman, 1982). However, as highlighted  
16 above, prior research has shown that this hypothesis is unlikely to be supported (Laughlin et al.,  
17 2018; Pistón et al., 2019; Worthy et al., 2020; Li et al., 2021). What is more likely is that  
18 multiple species share the same trait combination that confers similar demographic outcomes.

19         The maintenance of multiple species in a community having the same trait combination  
20 would likely only be possible if species are temporally or spatially segregating the environment.  
21 Species could benefit from temporal segregation through the storage effect, where species with  
22 the same trait combination are favored at different time periods (Chesson and Warner, 1981;  
23 Chesson, 2000; Adler et al., 2013). Species could also spatially segregate to reduce competition

1 when they have the same trait combination (Chesson, 2000; Wright, 2002), which may be  
2 evident in co-occurrence patterns of species. Both of these scenarios would appear as a low  
3 number of trait combinations at the community-level, even though species and functional  
4 diversity could be high. Of course, there could be a combination of all of these possibilities at  
5 work.

6 The goal of the present research was to determine if trait combinations are present within  
7 species and the impacts of this on species and functional diversity in a tropical forest seedling  
8 community. We asked three questions, 1) do trait combinations found across species, at the  
9 community-level, also exist within species?; 2) how consistent or inconsistent are trait  
10 combinations across species?; and 3) how do findings align with species co-occurrence patterns?  
11

## 12 **Material and Methods**

13 *Study Site:* The data set used in this study comes from a tropical forest seedling community in  
14 Xishuangbanna, in the Yunnan province of China (101°34'E, 21°36'N). The climate for this area  
15 is monsoonal with two seasons, the dry season that spans November to April and the wet season  
16 that spans May to October (Cao et al., 2008). The mean annual temperature is 21.8 °C and mean  
17 annual precipitation is 1,493 mm, with 85% of the precipitation occurring during the wet season  
18 (Cao et al., 2008).

19  
20 *Seedling Plot Establishment and Monitoring:* A total of 218 m<sup>2</sup> seedling plots were installed  
21 across an approximate area of 2-ha where all seedlings with a height of less than or equal to 50  
22 cm were tagged and identified. Height of these seedlings was taken during the installation of the

1 plots and at the end of a yearlong census from 2013-2014. Surviving seedlings were then  
2 harvested for functional trait quantification.

3  
4 *Species Data Set:* Most species in this community were rare, with few common species. Since  
5 this study focuses on variation within species, many species were eliminated from analyses due  
6 to lack of abundance. There were 122 species total among the plots, but this study includes the  
7 three species with at least 100 individuals, each from a different genus and family  
8 (Supplementary data Table S1).

9  
10 *Functional Traits:* Two functional trait measurements were taken on each harvested seedling.  
11 One organ-level trait, leaf mass per unit area (LMA), and one biomass allocation trait, root mass  
12 fraction (RMF; total root mass divided by whole plant mass). LMA was measured on one to  
13 three leaves for each individual. RMF was measured according to (Poorter et al. 2012) and  
14 previously reported in Umaña et al. (2015). Leaves and roots were manually separated in the lab  
15 and dried in the oven for 72 h at 70 °C. Trait variables were natural log-transformed and scaled  
16 to a mean of zero for each species separately prior to analyses (Supplementary data Table S1).

17 These two traits (LMA and RMF) were specifically chosen for measurement as they  
18 represent major allocation tradeoffs at both the organ and whole plant levels that should impact  
19 growth success. LMA represents the leaf economics spectrum (Reich et al., 1997, Wright et al.,  
20 2004) where species with higher LMA have lower mass-based photosynthetic rates, but longer  
21 leaf lifespans and species with lower LMA have higher mass-based photosynthetic rates, but  
22 shorter leaf life spans. RMF is often measured to quantify allocation to non-photosynthetic  
23 tissues.

1  
2  
3  
4  
5  
6  
7  
8  
9  
10  
11  
12  
13  
14  
15  
16  
17  
18  
19  
20  
21  
22  
23

*Quantifying Growth Rates:* To determine the relative growth rate (RGR) of each individual, the change in log-transformed height was calculated as:

$$\text{RGR} = (\log(M_{t+\Delta t}) - \log(M_t)) / \Delta t$$

The variable  $M_t$  is the height at successive time steps  $t$  (Hoffmann and Poorter, 2002). A value of 1 was added to all observed RGR values and the data were then natural log-transformed and scaled to a mean of 0 to approximate normality for each species separately. Relative growth rate served as the demographic rate of interest in this study.

*Environmental Variables:* Light availability and soil nutrients were measured once for each plot (Supplementary data Table S2). Light availability was measured as the percent canopy openness determined using photographs taken with a Nikon FC-E8 lens and a Nikon Coolpix 4500 camera one meter above the ground over each plot before sunrise with cloudy conditions. Images were analyzed using Gap Light Analyser software (<http://www.caryinstitute.org/science-program/our-scientists/dr-charles-d-canham/gap-light-analyzer-gla>). To measure soil nutrient levels, 50 g of the topsoil (0-10 cm in depth) was collected from each corner of each plot. Samples were air dried and sifted before analyses. Cation availability was determined using the Mehlich III extraction method and atomic emission inductively coupled plasma spectrometry (AE-ICP). Total nitrogen and carbon content were determined by total combustion using an auto-analyzer and pH measured with a pH meter. All soil analyses were conducted at the Biogeochemical Laboratory at Xishuangbanna Tropical Botanical Garden.

The environmental variables were natural log-transformed and scaled to a mean of zero before analyses. Soil nutrients were condensed into principal components and the first two



1 orthogonal axes were used in analyses with 39% of the variation explained by the first axis and  
2 21% of the variation explained by the second axis (Supplementary data Table S3). PC1 scores  
3 were negatively associated with K, Mg and Zn and PC2 scores were negatively associated with  
4 Ca and P (Supplementary data Fig. S1).

5  
6 *Linear Mixed-Effects Model Description:* To determine species' relationships between traits, the  
7 environment, and relative growth rate, we built linear mixed effects models using a Bayesian  
8 approach for each species separately. Variables were chosen for inclusion in the model based on  
9 prior evidence of their significant effects on growth performance (Baraloto et al., 2006; Poorter  
10 et al., 2012; Reich, 2014; Umaña et al., 2018; Worthy et al., 2020). For each species' model,  
11 RGR followed a log-normal distribution:

$$\log RGR_i \sim N(z_i, \sigma_z),$$

12  
13 where  $z_i$  was the relative growth rate of each individual and  $\sigma_z$  was the variance. The general  
14 formula of the model was:

$$\begin{aligned} 15 \quad z_i = & \alpha_p + \beta_1 \text{LMA} + \beta_2 \text{RMF} + \beta_3 \text{Initial Size} + \beta_4 \text{Light} + \beta_5 \text{Soil1} + \beta_6 \text{Soil2} + \beta_7 \text{LMA} \times \text{RMF} \\ 16 & + \beta_8 \text{LMA} \times \text{Light} + \beta_9 \text{LMA} \times \text{Soil1} + \beta_{10} \text{LMA} \times \text{Soil2} + \beta_{11} \text{RMF} \times \text{Light} \\ 17 & + \beta_{12} \text{RMF} \times \text{Soil1} + \beta_{13} \text{RMF} \times \text{Soil2} + \beta_{14} \text{LMA} \times \text{RMF} \times \text{Light} \\ 18 & + \beta_{15} \text{LMA} \times \text{RMF} \times \text{Soil1} + \beta_{16} \text{LMA} \times \text{RMF} \times \text{Soil2}, \end{aligned}$$

19 where  $z_i$  was the relative growth rate of each individual and  $\alpha_p$  was a random effect for plot.

20 The plot random effect was given a diffuse normal prior for mean and a diffuse half-  
21 Cauchy prior for variance, which is useful because it is a thick-tailed probability distribution that  
22 is weakly regularizing (McElreath, 2016). All other variables were given diffuse normal priors.  
23 All models were fit using Hamiltonian Monte Carlo sampling implemented in Stan (Stan

1 Development Team, 2020) interfaced with R programming language (R Development Core  
2 Team, 2016) using the *rethinking* (McElreath, 2016) and *rstan* (Stan Development Team, 2020)  
3 packages. We ran four independent chains with random initial values for 50,000 iterations and a  
4 warm-up period of 5,000 iterations. Parameter estimates and 95% credible intervals were  
5 obtained from the posterior distributions. Convergence of the chains along with each variable in  
6 the model was assessed visually and using the Gelman-Rubin convergence diagnostic with a  
7 cutoff value of 1.1 (Gelman and Rubin, 1992). A parameter was considered significant if its 95%  
8 credible intervals did not overlap zero.

9  
10 *Assessing Intraspecific Trait Combinations:* To determine the presence of trait combinations  
11 within a species, two conditions had to be supported. First, the two-way interaction term between  
12 LMA and RMF or any three-way interaction term, between the two traits and an environmental  
13 variable, in the model had to be significant with 95% credible intervals around the parameter  
14 estimate not overlapping zero. Second, the first partial derivative of the fitted model was  
15 calculated to determine if the relationship between a trait and RGR switches signs across the  
16 range of the other trait and/or environmental variable in the interaction (Laughlin et al., 2018;  
17 Worthy et al., 2020).

18  
19 *Quantifying Contribution of Variables to RGR:* We determined the contribution of each model  
20 variable to RGR for each species by multiplying the partial regression coefficient, separately, by  
21 the mean, minimum, and maximum observed trait and/or environmental variable following  
22 Arnold (1983). This allowed us to determine for each species which model variable contributed  
23 most positively to RGR and more specifically, the importance of trait combinations and their

1 interactions with the environment to RGR. The two principal component axes of the soil  
2 variables included negative values so the exponentials of these values were used to eliminate the  
3 negative values so that the contribution of these variables could be determined.

4  
5 *Co-Occurrence Patterns:* Co-occurrence patterns of the species were determined using the  
6 *cooccur* package (Griffith et al., 2016) in R based on the presence or absence of species across  
7 the seedling plots. This function calculated the observed and expected frequencies of co-  
8 occurrence between each pair of species, with the expected frequency based on the distribution  
9 of each species being random and independent of the other species (Veech, 2013). The function  
10 returned the probability of co-occurrence for all pairs of species along with pairs that have a  
11 higher or lower value of co-occurrence than could have been obtained by chance.

## 12 13 **Results**

### 14 *Assessing Intraspecific Trait Combinations*

15 Each species' model was assessed for the presence of intraspecific trait combinations  
16 (Supplementary data Table S4). Two of the three species showed evidence of trait combinations  
17 with significant interactions found between the two traits (LMA and RMF) and between the two  
18 traits and an environmental variable (Fig. 1). *Pseuduvaria indochinensis* (Annonaceae) did not  
19 show evidence of trait combinations but did have two significant two-way interactions between  
20 LMA and soil component 1 and the between RMF and light (Supplementary data Fig. S2).

21 *Parashorea chinensis* (Dipterocarpaceae) and *Pittosporopsis kerrii* (Icacinaceae) both showed  
22 evidence of trait combinations each having a significant two-way interaction between LMA and  
23 RMF (Fig. 2). For both species, RGR was higher when individuals had high LMA and low RMF

1 or when individuals had low LMA and high RMF (Fig. 2). A significant three-way interaction  
2 was also found between the two traits and a component of soil nutrients in models of both of  
3 these species. *P. chinensis* had a significant three-way interaction between LMA, RMF, and soil  
4 component 2 (Fig. 3A). At the poor nutrient end of the soil nutrient gradient, individuals had  
5 higher RGR when they combined low LMA with low RMF (Fig 3A). At the high nutrient end of  
6 the soil variable, there were two peaks in RGR, one for individuals with high LMA and low  
7 RMF and one for individuals with low LMA and high RMF (Fig 3A). *P. kerrii* had a significant  
8 three-way interaction between LMA, RMF and soil component 1 (Fig. 3B). At the low nutrient  
9 end of the soil gradient, individuals had higher RGR when they combined high LMA with high  
10 RMF or low LMA with low RMF (Fig. 3B). At the opposite end of the soil gradient with high  
11 nutrients, there were also two peaks in RGR, one for individuals with high LMA and low RMF  
12 and one for individuals with low LMA and high RMF (Fig. 3B).

13

#### 14 *Quantifying Contribution of Variables to RGR:*

15 The contribution of each model variable to RGR of each species was calculated at the mean,  
16 minimum, and maximum observed values of each variable (Supplementary data Table S5). Of  
17 the two traits in the models, LMA had a larger, direct contribution to RGR than RMF for all  
18 species when not considering how the traits are influenced by environmental variables or each  
19 other (Supplementary data Table S5). For two species, minimum LMA contributed most where  
20 for *P. kerrii* maximum LMA contributed most to RGR (Supplementary data Table S5). For the  
21 environmental variables, maximum observed light was the largest contributor to RGR for all  
22 species (Supplementary data Table S5). Despite finding evidence of significant trait  
23 combinations (Fig. 2) and that these combinations interact with soil nutrients (Fig. 3) for *P.*

1 *chinensis* and *P. kerrii*, these variables did not contribute most to RGR in these species. The  
2 overall largest, positive contributor to RGR for these two species was the interaction between  
3 maximum RMF and maximum soil component 2, high Ca and P in the soil (Supplementary data  
4 Table S5). For *P. indochinensis*, maximum light was the largest contributing variable to RGR  
5 (Supplementary data Table S5).

6

### 7 *Comparisons and Drivers of Species Trait Combinations*

8 One species in this study, *P. indochinensis*, did not show evidence of intraspecific trait  
9 combinations. However, significant interactions were found for this species between singular  
10 traits and environmental variables (Supplementary data Fig. S2). The two other species in this  
11 study did show evidence of intraspecific trait combinations (Figs. 1-3). *P. kerrii* and *P. chinensis*  
12 share one interaction term with evidence of multiple intraspecific trait combinations, LMA  $\times$   
13 RMF (Fig. 1-2). However, how individuals within these species combine these traits to achieve  
14 higher RGR differs based on the type and level (low versus high) of nutrients in the soil (Fig. 3).  
15 Interestingly, all three species significantly, negatively co-occur on the landscape  
16 (Supplementary data Table S6), suggestive of species spatially segregating due to similarity in  
17 trait combinations used to acquire resources.

18 While there was variation among species in the presence and type of trait combinations,  
19 all species were similar in what variables contributed most to increased RGR (Supplementary  
20 data Table S5). LMA dominated as a singular trait, but RMF was more common as part of  
21 interaction terms for the largest overall contributing variable to increased RGR (Supplementary  
22 data Table S5). All three species had the same environmental variable with the highest  
23 contribution, maximum light, and two of the species had the same variable with the largest

1 overall contribution to RGR, maximum RMF interacting with maximum soil component 2  
2 (Supplementary data Table S5). Similarity between all species for which variables contributed  
3 the most to increased RGR could suggest an underlying best strategy for growth in this  
4 community, but species capitalize on differentiation along other axes and/or use intraspecific  
5 trait combinations to acquire resources for growth.

6

## 7 **Discussion**

8 In this study, we have shown that two of the three most abundant seedling species in a tropical  
9 forest community have intraspecific trait combinations that, along with environmental variables,  
10 contribute to both similarities and differences in how these species achieve growth success.  
11 Below we discuss how variability in the presence, type, and importance of trait combinations  
12 among species maintains both species and functional diversity in this community.

13 Two of the three species in this study showed evidence of intraspecific trait  
14 combinations. Specifically, individuals within a species had trait  $\times$  trait, and/or trait  $\times$  trait  $\times$   
15 environment combinations that led to higher RGR (Fig. 1-3). Individuals within both *P.*  
16 *chinensis* and *P. kerrii* combined LMA and RMF in the same two ways to achieve higher RGR  
17 (Fig. 2). These findings support our hypothesis that species may have the same intraspecific trait  
18 combination. We also found support for these species spatially segregating the environment, with  
19 all species negatively co-occurring with the other species in the study (Supplementary data Table  
20 S6). In addition to similar intraspecific trait combinations, all species in the study were similar in  
21 what variables contributed most to increased RGR (Supplementary data Table S5). This could  
22 suggest an underlying best strategy for growth in this community which species deviate from to  
23 acquire limiting resources and decrease interspecific competition.

1           One way species may differentiate their strategies for growth in this community is by  
2 altering how they combine traits along soil nutrient gradients. Interestingly, the trait  
3 combinations of the two species combined in different ways while significantly interacting with  
4 different soil nutrients (Fig. 3). This allows individuals within these species to change or  
5 combine resource acquisition strategies (acquisitive and conservative) within and among  
6 environments along soil nutrient gradients to achieve growth success (Fig. 3). The ability of  
7 these species to alter how traits combine depending on the soil nutrient type and level supports  
8 the hypothesis that some species have highly variable traits with individuals within a species  
9 having different trait combinations that may overlap with other species. These results offer an  
10 explanation as to how communities can have a low number of trait combinations, but high  
11 species and functional diversity. Previous studies have suggested that high trait variability of  
12 species could allow them to maintain dominance in communities which seems plausible here as  
13 these species are some of the most abundant in this community (Richards et al., 2006; Hart et al.,  
14 2016; Pérez-Ramos et al., 2019). However, we note that this study includes only three species  
15 that are the most abundant in the seedling community and that we did not investigate moderately  
16 abundant or rare species due to sample size issues. Importantly, however, our results highlight  
17 that individuals within species are highly variable, with very phenotypically different individuals  
18 having similar growth performance, suggesting that using species mean traits to estimate  
19 individual growth or species mean growth may have critical conceptual and empirical  
20 consequences (Yang et al., 2018; Swenson et al., 2020; Yang et al., 2020).

21           The species in this study showed evidence of species-specific strategies for growth across  
22 multiple axes of trait and environmental variation. Commonly, we found that interactions  
23 between traits and the environment contributed most to species' RGR, such that similarity in

1 how species' acquire resources for growth may depend on which end of the environmental  
2 gradient the species is located in the community. A major takeaway from previous work was the  
3 suggestion that there are only a few dimensions along which species compete where they can  
4 partition resources and decrease interspecific competition (Clark et al., 2004; Condit et al., 2006;  
5 Clark et al., 2007; Mohan et al., 2007; Clark, 2010). This dynamic has been discussed previously  
6 as the paradox of low diversity where models tend to find low levels of species diversity, which  
7 do not align with observed levels, and are unable to explain how so many species can inhabit  
8 communities (Hutchinson, 1961; Clark, 2010). Our findings and others (D'Andrea et al., 2018),  
9 however, highlight the large amount and multi-dimensional nature of species differences in how  
10 they combine traits and alter traits along environmental gradients to acquire resources for growth  
11 and suggest how high species and functional diversity can be maintained in communities.

12 Overall, our results suggest that these common species are assembled in this seedling  
13 community via resource acquisition for growth along multiple as well as high-dimensional axes  
14 of trait and environmental variation. Our findings stress that individuals within species are able  
15 to exploit this multidimensionality in different ways, which would have gone unobserved in  
16 species-level analyses (Clark, 2010). While observational, this study considers multiple  
17 environmental variables, common functional traits, and their interactions to capture a broad  
18 range of ecological dimensions used to distinguish how species acquire resources for growth and  
19 understand how similarities and differences in resource acquisition strategies maintain species  
20 and functional diversity. This study capitalizes on a central tenet of trait-based ecology,  
21 differential demography can be attributed to phenotypic variation which should scale up to  
22 explain emergent patterns in communities (McGill et al., 2006; Yang et al., 2020).

23



## 1 **Supplementary Information**

2 Table S1: Minimum and maximum observed values of each functional trait and relative growth  
3 rate (RGR) of each species in the study, along with total number of individuals per species (n).  
4 Table S2: Soil nutrient concentration and percent of light availability ranges for all 218 seedling  
5 plots. Table S3: Principal component analysis loadings of the soil variables. Table S4: Mean  
6 standardized coefficients for each of the three species in the study. Table S5: The contribution of  
7 each model variable to RGR. Table S6: Results of co-occurrence patterns of the species. Figure  
8 S1: Principal components analysis of the soil properties. Figure S2: *P. indochinensis* (PSEUIN,  
9 373 individuals) had two significant two-way interactions.

10

## 11 **Acknowledgments**

12 Logistical support was provided by Xishuangbanna Station of Tropical Rainforest Ecosystem  
13 Studies (National Forest Ecosystem Research Station at Xishuangbanna), Chinese Academy of  
14 Sciences. S.J.W. and N.G.S. generated the research idea; M.N.U., C.Z, L.L., M.C. and N.G.S.  
15 organized and conducted data collection; S.J.W. analyzed data; and S.J.W., M.N.U., and N.G.S.  
16 wrote the paper with comments from all other authors.

17

## 18 **Funding**

19 This work was supported by a National Science Foundation US-China Dimensions of  
20 Biodiversity grant to NGS (DEB-1241136, DEB-1046113). The work was also supported by the  
21 Strategic Priority Research Program of Chinese Academy of Sciences (Grant No.  
22 XDB31000000), the National Key R&D Program of China (2016YFC0500202) and the Joint

1 Fund of the National Natural Science Foundation of China-Yunnan Province (31370445,  
2 31570430, 32061123003, U1902203).

3

4 **Open Data**

5 Data and code for the analyses in this manuscript are currently available on GitHub at  
6 <https://github.com/sjworthy/Intraspecific.Designs>. A Zenodo DOI will be obtained for the  
7 GitHub material upon manuscript acceptance.

8

9

## 1 **Literature Cited**

- 2 Ackerly DD. 2003. Community assembly, niche conservatism, and adaptive evolution in  
3 changing environments. *International Journal of Plant Sciences* 164: S165-S184.
- 4 Adler PB, Fajardo A, Kleinhesselink AR, Kraft NJB. 2013. Trait-based tests of coexistence  
5 mechanism. *Ecology Letters* 16: 1294-1306.
- 6 Arnold SJ. 1983. Morphology, performance and fitness. *American Zoologist* 23: 347-361.
- 7 Baraloto C, Bonal D, Goldberg DE. 2006. Differential seedling growth response to soil resource  
8 availability among nine neotropical tree species. *Journal of Tropical Ecology* 22: 487-497.
- 9 Cao M, Zhu H, Wang H, et al. 2008. *Xishuangbanna Tropical Seasonal Rainforest Dynamics*  
10 *Plot: Tree Distribution Maps, Diameter Tables and Species Documentation*. Kunming:  
11 Yunnan Science and Technology Press.
- 12 Chesson P. 2000. Mechanisms of maintenance of species diversity. *Annual Review of Ecology*  
13 *and Systematics* 31: 343-366.
- 14 Chesson PL, Warner RR. 1981. Environmental variability promotes coexistence in lottery  
15 competitive systems. *The American Naturalist* 117: 923-943.
- 16 Clark JS. 2010. Individuals and the variation needed for high species diversity in forest trees.  
17 *Science* 327: 1129-1132.
- 18 Clark JS, LaDeau S, Ibanez I. 2004. Fecundity of trees and the colonization-competition  
19 hypothesis. *Ecological Monographs* 74: 415-442.
- 20 Clark JS, Dietze M., Chakraborty S., et al. 2007. Resolving the biodiversity paradox. *Ecology*  
21 *Letters* 10: 647-662.
- 22 Clark JS, Bell D, Chu C, et al. 2010. High-dimensional coexistence based on individual  
23 variation: a synthesis of evidence. *Ecological Monographs* 80: 569-608.

- 1 Condit R, Ashton P, Bunyavejcheqin S, et al. 2006. The importance of demographic niches to  
2 tree diversity. *Science* 313: 98-101.
- 3 D’Andrea R, Ostling A, 2016. Challenges in linking trait patterns to niche differentiation. *Oikos*  
4 125: 139-1385.
- 5 D’Andrea R, Ostling A, O’Dwyer JP. 2018. Translucent windows: how uncertainty in  
6 competitive interactions impacts detection of community pattern. *Ecology Letters* 21: 826-  
7 835.
- 8 Dias ATC, Rosado BHP, de Bello F, Pistón N, de Mattos EA. 2019. Alternative plant designs:  
9 consequences for community assembly and ecosystem functioning. *Annals of Botany* 1-8.
- 10 Dwyer JM, Laughlin DC. 2017. Constraints on trait combinations explain climatic drivers of  
11 biodiversity: the importance of trait covariance in community assembly. *Ecology Letters* 20:  
12 872-882.
- 13 Enquist BJ, Kerkhoff AJ, Stark SC, Swenson NG, McCarthy MC, Price CA. 2007. A general  
14 integrative model for scaling plant growth, carbon flux, and functional trait spectra. *Nature*  
15 449: 218-222.
- 16 Gelman A, Rubin DB. 1992. Inference from iterative simulation using multiple sequences.  
17 *Statistical Science* 7: 457-511.
- 18 Griffith DM, Veech JA, Marsh CJ. 2016. Cooccur: Probabilistic species co-occurrence analysis  
19 in R. *Journal of Statistical Software* 69: 1-17.
- 20 Hart SP, Schreiber SJ, Levine JM. 2016. How variation between individuals affects species  
21 coexistence. *Ecology Letters* 19: 825-838.

- 1 HilleRisLambers J, Adler PB, Harpole WS, Levine JM, Mayfield MM. 2012. Rethinking  
2 community assembly through the lens of coexistence theory. *Annual Review of Ecology,*  
3 *Evolution, and Systematics* 43: 227-248.
- 4 Hoffmann WA, Poorter H. 2002. Avoiding bias in calculations of relative growth rate. *Annals of*  
5 *Botany* 80: 37-42.
- 6 Hutchinson GE. 1961. The paradox of the plankton. *The American Naturalist* 95:1 37-145.
- 7 Kraft NJB, Godoy O, Levine JM. 2015. Plant functional traits and the multidimensional nature of  
8 species coexistence. *Proceedings of the National Academy of Sciences USA* 112: 797-802.
- 9 Laughlin DC, Messier J. 2015. Fitness of multidimensional phenotypes in dynamic adaptive  
10 landscapes. *Trends in Ecology and Evolution* 30: 487-496.
- 11 Laughlin DC, Strahan RT, Adler PB, Moore MM. 2018. Survival rates indicate that correlations  
12 between community-weighted mean traits and environments can be unreliable estimates of  
13 the adaptive value of traits. *Ecology Letters* 21: 411-421.
- 14 Li Y, Jiang Y, Shipley B, et al. 2021. The complexity of trait-environment performance  
15 landscapes in a local subtropical forest. *New Phytologist* 229: 1388-1397.
- 16 MacArthur R, Levins R. 1967. The limiting similarity, convergence, and divergence of  
17 coexisting species. *The American Naturalist* 101: 377-385.
- 18 Marks CO, Lechowicz MJ. 2006. Alternative designs and the evolution of functional diversity.  
19 *The American Naturalist* 167: 55-66.
- 20 McElreath R. 2016. *Statistical Rethinking: A Bayesian Course with Examples in R and Stan*.  
21 Boca Raton: Chapman & Hall/CRC.
- 22 McGill BJ, Enquist BJ, Weiher E, Westoby M. 2006. Rebuilding community ecology from  
23 functional traits. *Trends in Ecology and Evolution* 21: 178-185.

- 1 Mohan JE, Clark JS, Schlesinger WH. 2007. Long-term CO<sub>2</sub> enrichment of a forest ecosystem:  
2 implications for forest regeneration and success. *Ecological Applications* 17: 1198-1212.
- 3 Onoda Y, Westoby M, Adler PB, et al. 2011. Global patterns of leaf mechanical properties.  
4 *Ecology Letters* 14: 301-312.
- 5 Pérez-Ramos IM, Matías L, Gómez-Aparicio L, Godoy Ó. 2019. Functional traits and  
6 phenotypic plasticity modulate species coexistence across contrasting climatic conditions.  
7 *Nature Communications* 10: 2555.
- 8 Pistón N, de Bello F, Dias ATC, et al. 2019. Multidimensional ecological analyses demonstrate  
9 how interactions between functional traits shape fitness and life history strategies. *Journal of*  
10 *Ecology* 107: 2317-2328.
- 11 Poorter H, Remkes C. 1990. Leaf area ratio and net assimilation rate of 24 wild species differing  
12 in relative growth rate. *Oecologia* 83: 553-559.
- 13 Poorter H, Niklas KJ, Reich PB, Oleksyn J, Poot P, Mommer L. 2012. Biomass allocation to  
14 leaves, stems and roots: meta-analyses of interspecific variation and environmental control.  
15 *New Phytologist* 193: 30-50.
- 16 R Development Core Team. 2016. R: A language and environment for statistical computing. R  
17 Foundation for Statistical Computing, Vienna, Austria. <https://www.R-project.org/>.
- 18 Reich PB. 2014. The world-wide “fast-slow” plant economics spectrum: a traits manifesto.  
19 *Journal of Ecology* 102: 275-301.
- 20 Reich PB, Walters MB, Ellsworth DS. 1997. From tropics to tundra: Global convergence in plant  
21 functioning. *Proceedings of the National Academy of Sciences USA* 94: 13730-13734.
- 22 Richards CL, Bossdorf O, Muth NZ, Gurevitch J, Pigliucci M. 2006. Jack of all trades, master of  
23 some? On the role of phenotypic plasticity in plant invasions. *Ecology Letters* 9: 981-993.

- 1 Stan Development Team. 2020. RStan: the R interface to Stan. R package version 2.19.3.  
2 <http://mc-stan.org>.
- 3 Swenson NG, Worthy SJ, Eubanks D, et al. 2020. A reframing of trait-demographic rate analyses  
4 for ecology and evolutionary biology. *International Journal of Plant Sciences* 181: 33-43.
- 5 Tilman D .1982. *Resource competition and community structure*. Princeton: Princeton University  
6 Press.
- 7 Turcotte MM, Levine JM. 2016. Phenotypic plasticity and species coexistence. *Trends in*  
8 *Ecology and Evolution* 31: 803-813.
- 9 Umaña MN, Zhang C, Cao M, Lin L, Swenson NG. 2015. Commonness, rarity, and intraspecific  
10 variation in traits and performance in tropical tree seedlings. *Ecology Letters* 18: 1329-1337.
- 11 Umaña MN, Zipkin EF, Zhang C, Cao M, Lin L, Swenson NG. 2018. Individual-level trait  
12 variation and negative density dependence affect growth in tropical tree seedlings. *Journal of*  
13 *Ecology* 106: 2446-2455.
- 14 Veech JA. 2013. A probabilistic model for analyzing species co-occurrence. *Global Ecology and*  
15 *Biogeography* 22: 252-260.
- 16 Worthy SJ, Laughlin DC, Zambrano J, et al. 2020. Alternative designs and tropical tree seedling  
17 growth performance landscapes. *Ecology* 101: e03007.
- 18 Wright IJ, Reich PB, Westoby M, et al. 2004. The worldwide leaf economics spectrum. *Nature*  
19 428: 821-827.
- 20 Wright IJ, Westoby M. 1999. Differences in seedling growth behavior among species: trait  
21 correlations across species, and trait shifts along nutrient compared to rainfall gradients.  
22 *Journal of Ecology* 87: 85-97.

- 1 Wright SJ. 2002. Plant diversity in tropical forests: a review of mechanisms of species  
2 coexistence. *Oecologia* 130: 1-14.
- 3 Yang J, Cao M, Swenson NG. 2018. Why functional traits do not predict trait demographic rates.  
4 *Trends in Ecology and Evolution* 33: 326-336.
- 5 Yang J, Song X, Cao M, et al. 2020. On the modeling of tropical tree growth: the importance of  
6 intra-specific trait variation, non-linear functions and phenotypic integration. *Annals of*  
7 *Botany* 127: 533-542.
- 8 Zirbel CR, Brudvig LA. 2020. Trait-environment interactions affect plant establishment success  
9 during restoration. *Ecology* 101: e02971.



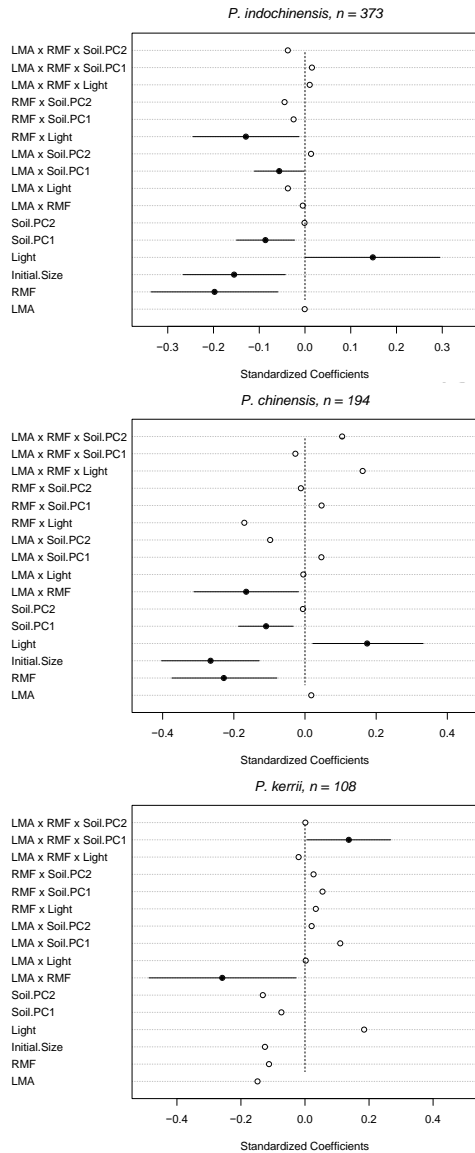

26 **Figure 1.** Standardized regression coefficients for each of the three species in the study for  
 27 models examining the relationships between traits, environmental variables, and their  
 28 interactions on seedling relative growth rate. Circles represent posterior mean values and filled  
 29 circles indicate significant effects. Lines representing 95% credible intervals are only presented  
 30 for significant effects to minimize the x axis and allow better viewing. All variables were natural  
 31 log-transformed and scaled to unit variance. PC1 scores are negatively associated with K, Mg  
 32 and Zn and PC2 scores are negatively associated with Ca and P.

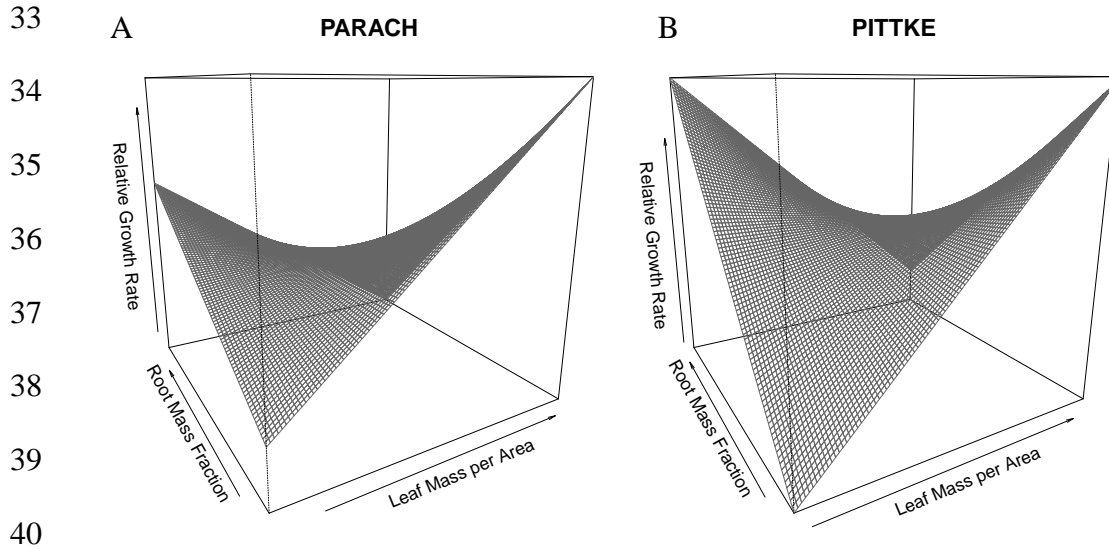

41 **Figure 2.** *P. chinensis* (PARACH, 194 individuals) and *P. kerrii* (PITTKE, 108 individuals) each  
42 had a significant two-way interaction between leaf mass per area (LMA) and root mass fraction  
43 (RMF) showing evidence of intraspecific trait combinations. For both species, PARACH (**A**) and  
44 PITTKE (**B**), individuals had higher relative growth rate (RGR) when they had high LMA and  
45 low RMF, but also had higher RGR when they combined low LMA with high RMF.

46

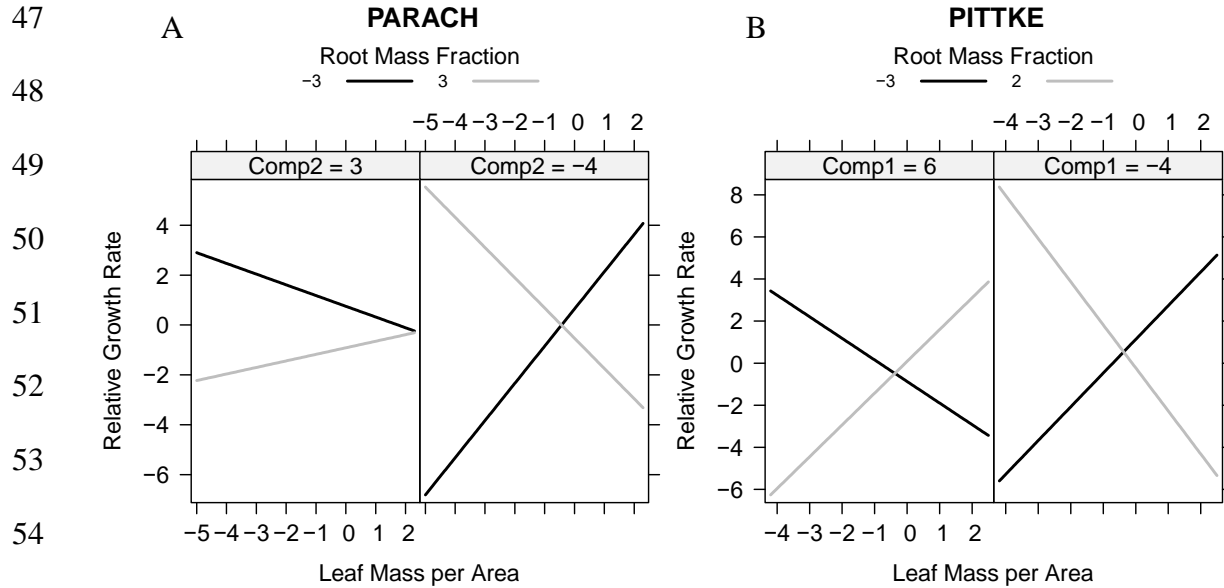

47 **Figure 3.** *P. chinensis* (PARACH, 194 individuals) and *P. kerrii* (PITTKE, 108 individuals) each  
48 had a significant three-way interaction between leaf mass per area (LMA), root mass fraction  
49 (RMF) and one of the soil nutrient principal components. (A) For PARACH, the interaction was  
50 between LMA, RMF, soil component 2 (Comp2). The low soil environment of soil component 2  
51 has high levels of Ca and P due to its negative association with these minerals. At the poor  
52 nutrient, high value end of the soil variable, (Comp2 = 3) individuals had higher relative growth  
53 rate (RGR) when they combined low LMA with low RMF. At the high nutrient end of the soil  
54 variable (Comp2 = -4), there were two peaks in RGR, one for individuals that combined high  
55 LMA with low RMF and one for individuals that combined low LMA with high RMF. (B) For  
56 PITTKE, the interaction was between LMA, RMF, and soil component 1 (Comp1). The low soil  
57 environment of soil component 1 has high levels of Mg, K and Zn due to its negative association  
58 with these minerals. At the high end of the soil gradient (Comp1 = 6), which corresponds to low  
59 nutrient levels, individuals had higher RGR when they combined high LMA with high RMF or  
60 low LMA with low RMF. At the opposite end of the gradient (Comp1 = -4) with high soil  
61  
62  
63  
64  
65  
66  
67  
68  
69

70 nutrients, there were two peaks in RGR, one for individuals with high LMA and low RMF and  
71 one for individuals with low LMA and high RMF. All variables were scaled and natural log-  
72 transformed.
